# Supplementary material for: Ultrahigh-pressure supercritical fluid extraction and chromatography of Moringa oleifera and Moringa peregrina seed lipids
Source: PubMed Central journal article supplement (PMC6571088; doi:10.1007/s00216-019-01850-x), 2019-05-04
Supplement: 216_2019_1850_MOESM1_ESM.pdf [file 216_2019_1850_MOESM1_ESM.pdf]

**Analytical and Bioanalytical Chemistry**

**Electronic Supplementary Material**

**Ultrahigh pressure supercritical fluid extraction and chromatography  
of *Moringa oleifera* and *Moringa peregrina* seed lipids**

Yannick Nuapia Belo, Said Al-Hamimi, Luke Chimuka, Charlotta Turner

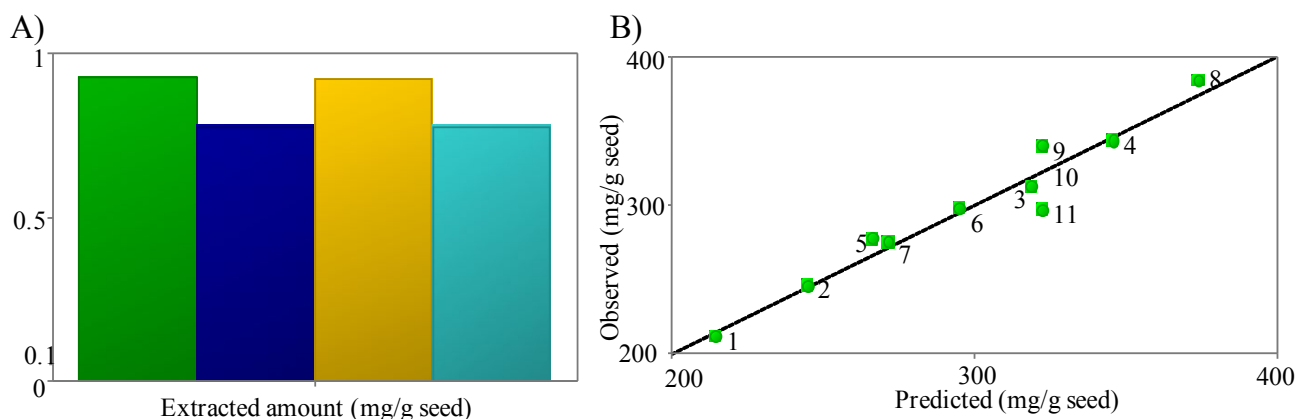

**Fig. S1** (A) DOE model fitting shows the  $R^2$  (94%) and  $Q^2$  (85%) values with validity and repeatability evaluations. (B) The plot validates the model by plotting the predicted values with experimental values which resulted in linear relationship

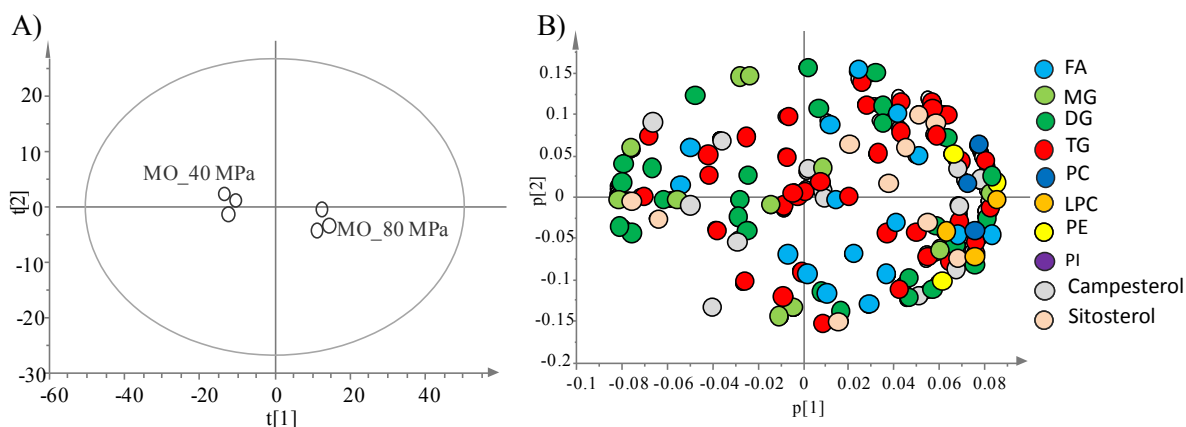

**Fig. S2** PCA model shows the discrimination in the MS data (peak area) obtained at 40 and 80 MPa in both modes (+ and -) from *Moringa oleifera*, (A) is the score plot and (B) is the loading plot. The model describes variation,  $R^2=0.93$ ; predictive ability,  $Q^2=0.80$ . The first component described 72% of total variation and the second component accounted for 22%

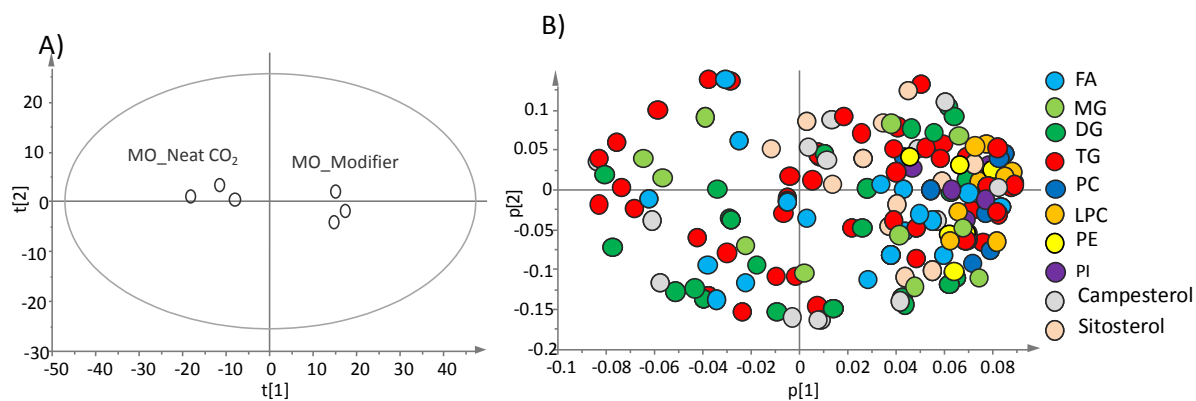

**Fig. S3** PCA model showing the discrimination in the MS data (peak area) obtained from *Moringa oleifera* at the optimal condition of SFE with modifier and using neat CO<sub>2</sub> at 80 MPa. (A) is the score plot and (B) is the loading plot. The model describes variation,  $R^2=0.88$ ; predictive ability,  $Q^2=0.79$ . The first component described 74% of total variation and the second component accounted for 16%

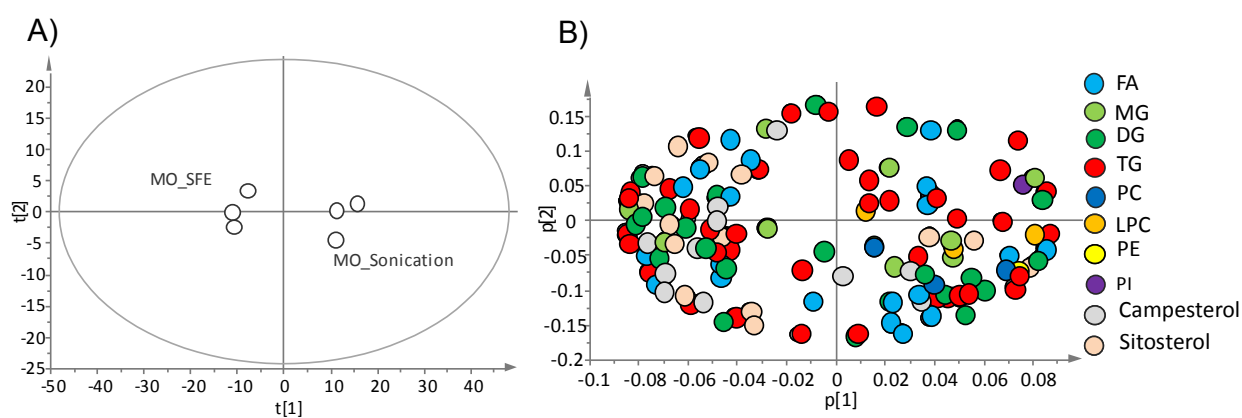

**Fig. S4** PCA model shows the discrimination in the MS data (peak area) obtained from *Moringa oleifera* at the optimal condition of SFE and using conventional method (sonication). (A) is the score plot and (B) is the loading plot. The model describes variation,  $R^2=0.83$ ; predictive ability,  $Q^2=0.76$ . The first component described 65% of total variation and the second component accounted for 25%

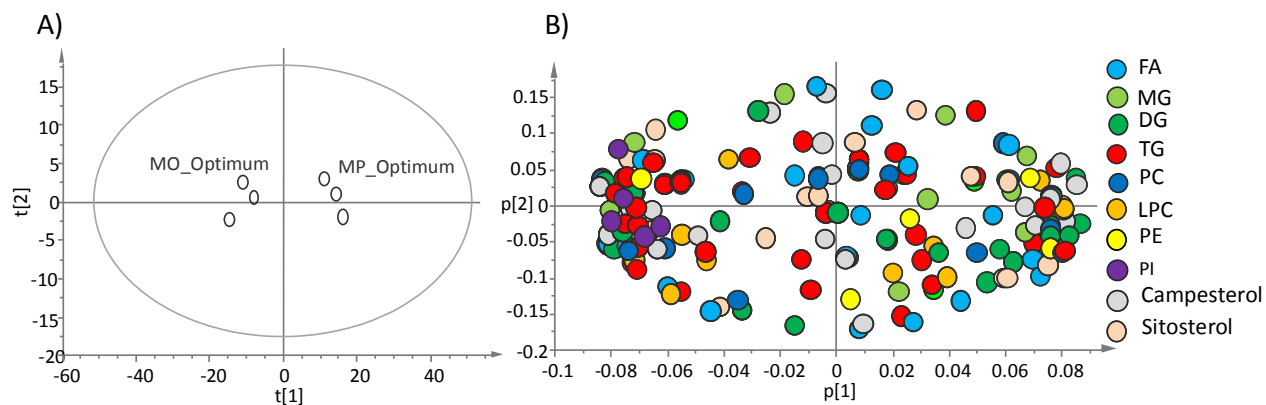

**Fig. S5** PCA model shows the discrimination in the MS data (peak area) obtained from *Moringa oleifera* at the optimal condition of SFE with modifier and using neat CO<sub>2</sub> at 80 MPa. (A) is the score plot and (B) is the loading plot. The model describes variation,  $R^2=0.88$ ; predictive ability,  $Q^2=0.79$ . The first component described 74% of total variation and the second component accounted for 16%

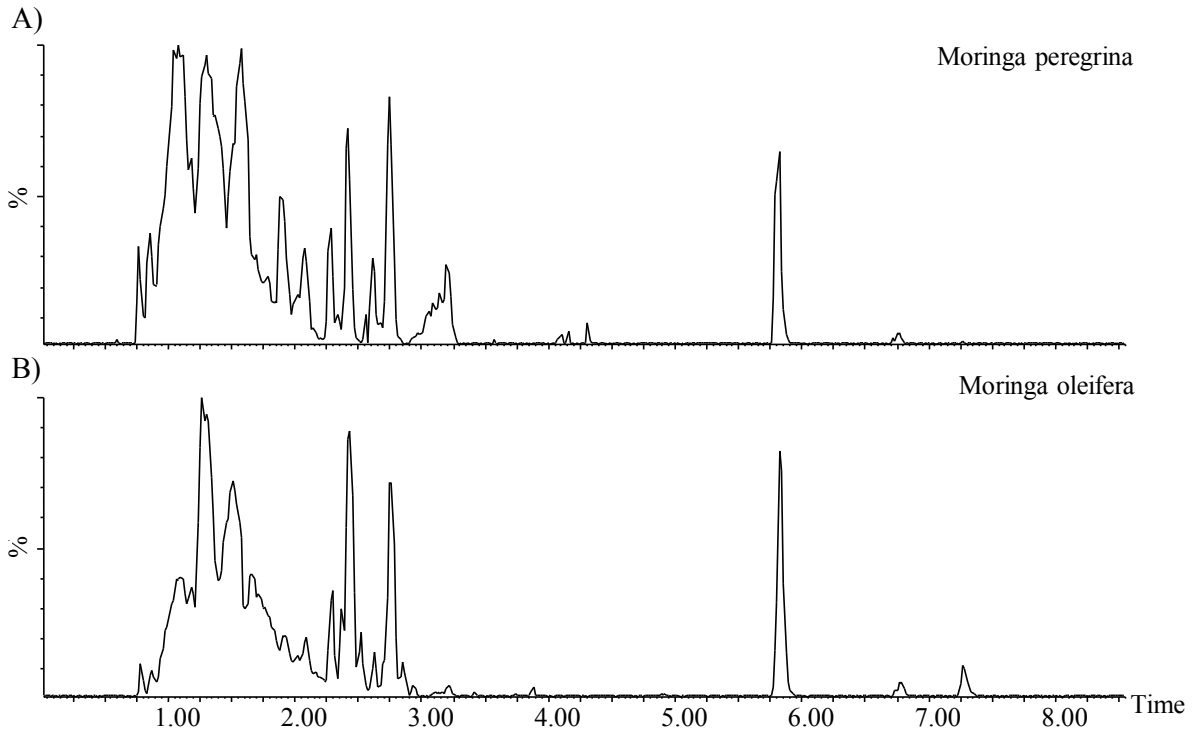

**Fig. S6** The (BPI) chromatograms in positive ESI for *Moringa peregrina* (A) and *oleifera* (B)

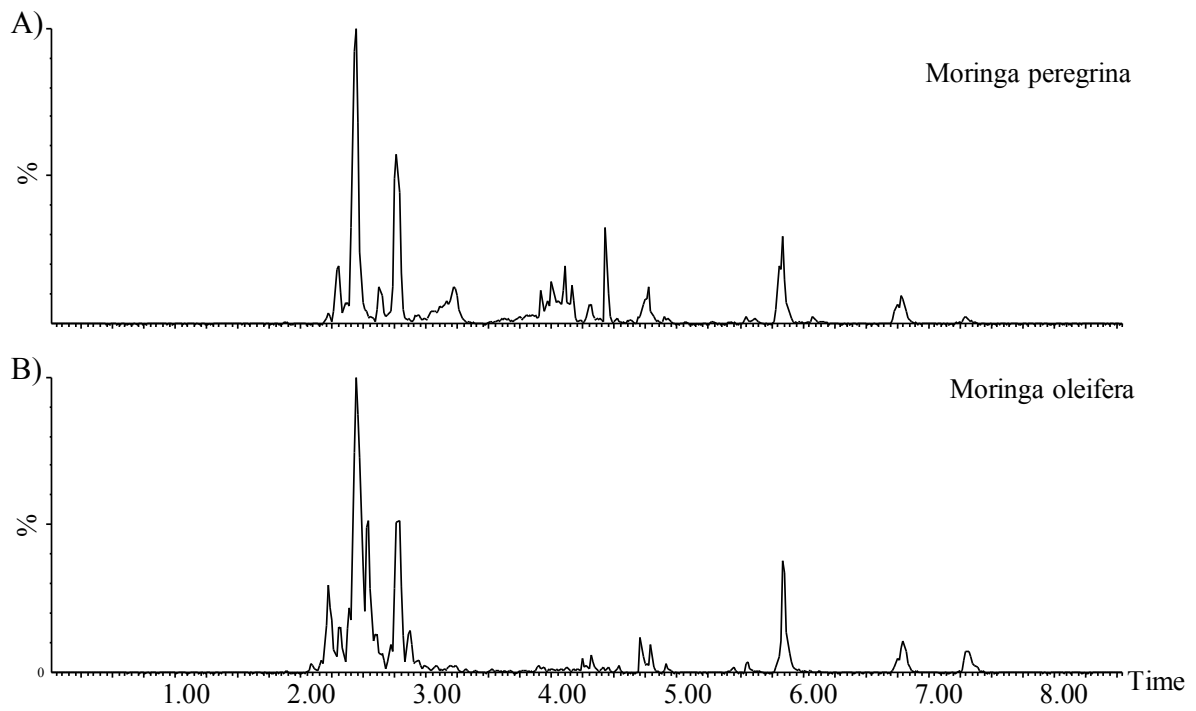

**Fig. S7** The (BPI) chromatograms in negative ESI for *Moringa peregrina* (A) and *oleifera* (B)

**Table S1** Relative peak area of lipids detected in oil extracted from *Moringa Oleifera* seeds at 40 and 80 MPa

| <b>Lipid species detected higher at 80 MPa</b> |               |               |
|------------------------------------------------|---------------|---------------|
| <b>Identification</b>                          | <b>80 MPa</b> | <b>40 MPa</b> |
| TG 54:7                                        | 1±0.47        | 0.06±0.01     |
| 20:0-Campesterol                               | 1±0.12        | 0.22±0.03     |
| 16:0-Campesterol                               | 1±0.25        | 0.25±0.03     |
| TG 42:0                                        | 1±0.26        | 0.27±0.03     |
| 1,2 DG 36:6                                    | 1±0.1         | 0.31±0.04     |
| TG 55:5                                        | 1±0.25        | 0.35±0.04     |
| TG 50:4                                        | 1±0.07        | 0.45±0.05     |
| TG42:2                                         | 1±0.3         | 0.46±0.05     |
| TG 44:5                                        | 1±0.26        | 0.47±0.06     |
| TG 60:3                                        | 1±0.03        | 0.52±0.06     |
| TG 58:2                                        | 1±0.06        | 0.52±0.06     |
| TG 55:4                                        | 1±0.07        | 0.52±0.06     |
| TG 49:3                                        | 1±0.14        | 0.52±0.06     |
| 18:3-Campesterol                               | 1±0.1         | 0.55±0.06     |
| TG 58:3                                        | 1±0.03        | 0.56±0.07     |
| TG 53:3                                        | 1±0.07        | 0.56±0.07     |
| TG 52:4                                        | 1±0.05        | 0.57±0.07     |
| TG 49:1                                        | 1±0.06        | 0.57±0.07     |

| <b>Identification</b> | <b>80 MPa</b> | <b>40 MPa</b> |
|-----------------------|---------------|---------------|
| TG 50:0               | 1±0.09        | 0.67±0.08     |
| TG 54:5               | 1±0.1         | 0.67±0.08     |
| TG 50:1               | 1±0.1         | 0.67±0.08     |
| TG 48:0               | 1±0.1         | 0.67±0.08     |
| TG 56:0               | 1±0.14        | 0.67±0.08     |
| TG 53:6               | 1±0.06        | 0.68±0.08     |
| TG 48:1               | 1±0.05        | 0.69±0.08     |
| TG 51:3               | 1±0.08        | 0.69±0.08     |
| TG 55:2               | 1±0.1         | 0.69±0.08     |
| TG 53:2               | 1±0.03        | 0.7±0.08      |
| TG 54:3               | 1±0.04        | 0.7±0.08      |
| TG 51:5               | 1±0.08        | 0.7±0.08      |
| TG 60:5               | 1±0.26        | 0.71±0.2      |
| 1,3 DG 34:4           | 1±0.02        | 0.71±0.2      |
| 1,3 DG 35:5           | 1±0.11        | 0.72±0.25     |
| TG 50:3               | 1±0.07        | 0.72±0.08     |
| 1,2 DG 35:6           | 1±0.07        | 0.72±0.08     |
| TG 54:2               | 1±0.05        | 0.74±0.09     |
| TG 58:4               | 1±0.11        | 0.74±0.09     |

|             |        |           |
|-------------|--------|-----------|
| TG 44:2     | 1±0.22 | 0.57±0.07 |
| TG 48:3     | 1±0.07 | 0.58±0.07 |
| TG 42:1     | 1±0.25 | 0.58±0.07 |
| TG 46:5     | 1±0.23 | 0.59±0.07 |
| TG 60:2     | 1±0.04 | 0.6±0.07  |
| TG 51:3     | 1±0.05 | 0.6±0.07  |
| TG 49:2     | 1±0.07 | 0.6±0.07  |
| TG 53:4     | 1±0.08 | 0.6±0.07  |
| TG 49:0     | 1±0.12 | 0.61±0.07 |
| TG 56:5     | 1±0.09 | 0.62±0.07 |
| TG 56:4     | 1±0.07 | 0.63±0.07 |
| TG 51:2     | 1±0.08 | 0.63±0.07 |
| TG 46:1     | 1±0.21 | 0.63±0.07 |
| TG 53:5     | 1±0.04 | 0.64±0.07 |
| TG 60:3     | 1±0.16 | 0.64±0.07 |
| 1,2 DG 35:4 | 1±0.02 | 0.65±0.08 |
| TG 54:6     | 1±0.08 | 0.66±0.08 |
| TG 46:2     | 1±0.15 | 0.66±0.08 |
| TG 48:2     | 1±0.06 | 0.67±0.08 |

|             |        |           |
|-------------|--------|-----------|
| TG 55:6     | 1±0.02 | 0.75±0.09 |
| TG 52:3     | 1±0.07 | 0.75±0.09 |
| TG 56:1     | 1±0.06 | 0.75±0.09 |
| TG 52:0     | 1±0.12 | 0.75±0.09 |
| TG 56:3     | 1±0.12 | 0.76±0.09 |
| TG 54:4     | 1±0.08 | 0.78±0.09 |
| TG 54:1     | 1±0.1  | 0.78±0.09 |
| 1,2 DG 35:3 | 1±0.02 | 0.79±0.09 |

| <b>Lipid species detected higher at 40 MPa</b> |         |           |
|------------------------------------------------|---------|-----------|
| 1,3 DG 38:1                                    | 1±0.03  | 1.24±0.14 |
| 1,3 DG 34:3                                    | 1±0.14  | 1.45±0.17 |
| MG 20:4                                        | 1±0.04  | 1.46±0.17 |
| 1,2 DG 35:0                                    | 1±0.23  | 1.47±0.17 |
| TG 55:3                                        | 1±0.07  | 1.69±0.2  |
| 1,2 DG 32:3                                    | 1±0.1   | 1.7±0.2   |
| TG 60:5                                        | 1±0.26  | 1.7±0.2   |
| 1,3 DG 34:4                                    | 1±0.02  | 1.71±0.2  |
| 1,2 DG 38:4                                    | 1±0.08  | 1.71±0.2  |
| 1,3 DG 32:3                                    | 1±0.1   | 1.71±0.2  |
| MG 18:0                                        | 1±0.19  | 1.79±0.21 |
| 1,3 DG 35:5                                    | 1±0.11  | 2.17±0.25 |
| MG 18:1                                        | 1±0.1,2 | 2.28±0.27 |
| MG 16:0                                        | 1±0.87  | 3.32±0.39 |

| <b>Lipid species detected uniquely at 80 MPa</b> |
|--------------------------------------------------|
| PC 34:1                                          |
| PC 32:2                                          |
| LPC 16:0                                         |
| PC 36:1                                          |
| PE 38:2                                          |
| PE 36:2                                          |
| PE 34:1                                          |



**Table S2** Relative peak area of lipid species detected in the oil obtained from *Moringa oleifera* seeds using neat CO<sub>2</sub> and CO<sub>2</sub> with modifier (ethanol) at 80 MPa

| <b>Lipid species detected higher at 80 MPa with modifier (ethanol)</b> |                 |                            |
|------------------------------------------------------------------------|-----------------|----------------------------|
| <b>Identification</b>                                                  | <b>Modifier</b> | <b>neat CO<sub>2</sub></b> |
| 20:2-Stigmasterol                                                      | 1±0.03          | 0.01±0                     |
| FA 16:1                                                                | 1±0.33          | 0.01±0.01                  |
| 22:2-Sitosterol                                                        | 1±0.03          | 0.01±0.01                  |
| 20:3-Campesterol                                                       | 1±0.1           | 0.01±0.02                  |
| 1,3 DG 36:6                                                            | 1±0.02          | 0.02±0                     |
| TG 50:4                                                                | 1±0.03          | 0.02±0                     |
| 1,3DG 32:2                                                             | 1±0.03          | 0.02±0                     |
| 20:0-Campesterol                                                       | 1±0.03          | 0.02±0                     |
| TG 58:5                                                                | 1±0.03          | 0.02±0                     |
| FA 18:3                                                                | 1±0.15          | 0.02±0.02                  |
| TG 50:5                                                                | 1±0.36          | 0.02±0.04                  |
| 18:3-Sitosterol                                                        | 1±0.04          | 0.03±0                     |
| TG 53:3                                                                | 1±0.12          | 0.03±0                     |
| 20:2-Sitosterol                                                        | 1±0.06          | 0.03±0                     |
| 20:1-Stigmasterol                                                      | 1±0.04          | 0.03±0                     |
| MG 18:2                                                                | 1±0.05          | 0.04±0.03                  |
| FA 20:1                                                                | 1±0.23          | 0.04±0.04                  |

| <b>Identification</b> | <b>Modifier</b> | <b>neat CO<sub>2</sub></b> |
|-----------------------|-----------------|----------------------------|
| 20:2-Campesterol      | 1±0.03          | 0.1,2±0.04                 |
| FA 20:0               | 1±0.14          | 0.1,2±0.15                 |
| TG 60:2               | 1±0.06          | 0.1,3±0                    |
| 1,2 DG 38:3           | 1±0.04          | 0.14±0.03                  |
| 1,2 DG 35:0           | 1±0.08          | 0.16±0.04                  |
| TG 44:3               | 1±0.49          | 0.17±0.08                  |
| 20:3-Sitosterol       | 1±0.06          | 0.19±0.01                  |
| 18:3-Campesterol      | 1±0.11          | 0.21±0.02                  |
| 16:1-Sitosterol       | 1±0.03          | 0.22±0.01                  |
| 1,3 DG 36:5           | 1±0.05          | 0.23±0.02                  |
| 16:3-Sitosterol       | 1±0.04          | 0.23±0.06                  |
| 20:0-Sitosterol       | 1±0.03          | 0.24±0.03                  |
| 1,3 DG 34:4           | 1±0.07          | 0.25±0                     |
| 20:1-Sitosterol       | 1±0.05          | 0.25±0.03                  |
| 22:0-Campesterol      | 1±0.11          | 0.25±0.08                  |
| 16:0-Sitosterol       | 1±0.02          | 0.27±0.02                  |
| 1,2 DG 32:3           | 1±0.01          | 0.29±0.03                  |

|                   |        |           |
|-------------------|--------|-----------|
| 16:1-Campesterol  | 1±0    | 0.05±0.02 |
| 1,3 DG 36:7       | 1±0.02 | 0.05±0.06 |
| FA 22:4           | 1±0.31 | 0.05±0.09 |
| 18:2-Stigmasterol | 1±0.06 | 0.06±0    |
| 18:1-Stigmasterol | 1±0.05 | 0.06±0.01 |
| 22:1-Stigmasterol | 1±0.18 | 0.07±0.03 |
| 16:2-Campesterol  | 1±0.01 | 0.08±0    |
| 22:0-Sitosterol   | 1±0.08 | 0.08±0.01 |
| 16:2-Sitosterol   | 1±0.02 | 0.08±0.01 |
| 22:1-Sitosterol   | 1±0.04 | 0.08±0.01 |
| 20:1-Campesterol  | 1±0.04 | 0.08±0.01 |
| TG 60:4           | 1±0.12 | 0.08±0.02 |
| 16:3-Campesterol  | 1±0.04 | 0.09±0.01 |
| 1,3 DG 36:3       | 1±0.02 | 0.09±0.01 |
| TG 60:3           | 1±0.32 | 0.09±0.01 |
| 22:2-Campesterol  | 1±0.04 | 0.1±0.01  |
| 18:2-Sitosterol   | 1±0.01 | 0.1±0.01  |
| 16:2-Stigmasterol | 1±0.01 | 0.1±0.02  |
| 1,3 DG 38:3       | 1±0.01 | 0.1±0.02  |
| FA 18:0           | 1±0.18 | 0.11±0.09 |

|                   |        |            |
|-------------------|--------|------------|
| 1,3 DG 32:3       | 1±0.01 | 0.29±0.03  |
| 16:3-Stigmasterol | 1±0.04 | 0.33±0.03  |
| 1,3 DG 34:3       | 1±0.01 | 0.34±0.05  |
| 1,3 DG 38:4       | 1±0.02 | 0.39±0.03  |
| 1,3 DG 35:5       | 1±0.04 | 0.4±0.05   |
| 16:0-Campesterol  | 1±0.09 | 0.41±0.1   |
| 18:2-Campesterol  | 1±0.06 | 0.44±0.03  |
| 18:3-Stigmasterol | 1±0.11 | 0.45±0.08  |
| 1,3 DG 32:0       | 1±0.07 | 0.45±0.29  |
| 1,2 DG 38:0       | 1±0    | 0.51±0.05  |
| 1,3 DG 35:6       | 1±0.03 | 0.57±0.04  |
| 1,2 DG 38:1       | 1±0    | 0.75±0.03  |
| 1,2 DG 32:0       | 1±0.07 | 0.75±0.1,2 |

| <b>Lipid species detected uniquely at 80 MPa with modifier (ethanol)</b> |                  |                  |
|--------------------------------------------------------------------------|------------------|------------------|
| 22:2-Stigmasterol                                                        | 20:3-Campesterol | PI 36:5          |
| 22:3-Sitosterol                                                          | LPC 22:1         | LPC 20:3         |
| PC 34:0                                                                  | PC 35:3          | LPC 20:2         |
| PC 42:2                                                                  | PC 37:3          | 18:0-Campesterol |
| MG 22:6                                                                  | 18:1-Campesterol | LPC 16:1         |
| PC 35:1                                                                  | PC 36:1          | LPC 18:0         |
| PC 36:1                                                                  | FA 18:2          | LPC 18:1         |
| PE 36:2                                                                  | 22:3-lesterol    | LPC 16:2         |
| PC 34:1                                                                  | PC 35:4          | LPC 18:3         |
| PC 32:2                                                                  | 22:3-Campesterol | PC 34:5          |
| PE 38:2                                                                  | PC 37:2          | PE 34:0          |
| PE 34:1                                                                  | LPC 18:2         | FA 22:3          |
| LPC 19:0                                                                 | PE 38:2          | PE 32:1          |
| PE 36:2                                                                  | FA 20:2          | LPE 17:0         |
| FA 22:1                                                                  | LPC 19:1         | PC 35:5          |
| LPC 20:5                                                                 | PI 36:0          | PC 40:2          |

**Table S3** Relative peak area of lipid species detected in the oil obtained from *Moringa Oleifera* (MO) and *Moringa Peregrina* (MP) seeds using neat CO<sub>2</sub> with modifier (ethanol) at 80 MPa

| <b>Lipid species detected higher in MP</b> |           |           |
|--------------------------------------------|-----------|-----------|
| <b>Identification</b>                      | <b>MP</b> | <b>MO</b> |
| 16:0-Campesterol                           | 1±0.34    | 0.02±0.02 |
| 22:1-Stigmasterol                          | 1±0.04    | 0.04±0    |
| 22:2-Sitosterol                            | 1±0.04    | 0.04±0    |
| 22:0-Campesterol                           | 1±0.58    | 0.04±0.02 |
| 20:1-Stigmasterol                          | 1±0.03    | 0.05±0    |
| 20:2-Sitosterol                            | 1±0.03    | 0.05±0    |
| MG 20:4                                    | 1±0       | 0.05±0.01 |
| 20:0-Sitosterol                            | 1±0.08    | 0.06±0    |
| 18:3-Stigmasterol                          | 1±0.03    | 0.06±0    |
| MG 18:1                                    | 1±0.04    | 0.06±0.01 |
| 22:0-Stigmasterol                          | 1±0.18    | 0.06±0.01 |
| 22:1-Sitosterol                            | 1±0.18    | 0.06±0.01 |
| 1,3 DG 38:4                                | 1±0.02    | 0.07±0    |
| 16:3-Stigmasterol                          | 1±0.03    | 0.07±0    |
| 18:0-Stigmasterol                          | 1±0.05    | 0.08±0    |
| 18:1-Sitosterol                            | 1±0.05    | 0.08±0    |
| 20:0-Stigmasterol                          | 1±0.04    | 0.08±0.01 |
| 20:1-Sitosterol                            | 1±0.04    | 0.08±0.01 |

| <b>Identification</b> | <b>MP</b> | <b>MO</b> |
|-----------------------|-----------|-----------|
| TG 60:3               | 1±0.03    | 0.47±0.01 |
| TG 60:2               | 1±0.01    | 0.48±0.02 |
| TG 52:5               | 1±0.11    | 0.48±0.03 |
| TG 60:6               | 1±0.18    | 0.48±0.05 |
| 1,3 DG 35:5           | 1±0.04    | 0.49±0.01 |
| 1,3 DG 36:0           | 1±0.02    | 0.49±0.02 |
| 20:2-Campesterol      | 1±0.03    | 0.49±0.04 |
| PE 36:2               | 1±0.09    | 0.49±0.09 |
| PE 34:2               | 1±0.25    | 0.5±0.1   |
| TG 60:5               | 1±0.08    | 0.5±0.11  |
| PC 36:3               | 1±0.01    | 0.51±0.02 |
| PC 33:2               | 1±0.01    | 0.52±0.04 |
| PE 36:1               | 1±0.04    | 0.52±0.11 |
| 18:2-Sitosterol       | 1±0.06    | 0.54±0.12 |
| 18:1-Stigmasterol     | 1±0.06    | 0.54±0.12 |
| 20:3-Stigmasterol     | 1±0.11    | 0.55±0.02 |
| 1,2 DG 32:3           | 1±0.01    | 0.56±0.01 |
| 1,2 DG 35:4           | 1±0.01    | 0.56±0.02 |

|                   |        |           |
|-------------------|--------|-----------|
| 18:0-Sitosterol   | 1±0.03 | 0.09±0    |
| LPC 20:4          | 1±0.02 | 0.1±0.01  |
| 1,3 DG 38:0       | 1±0.04 | 0.12±0.01 |
| 1,2 DG 38:0       | 1±0.04 | 0.12±0.01 |
| 16:0-Sitosterol   | 1±0    | 0.13±0    |
| LPE 18:1          | 1±0.01 | 0.14±0.01 |
| 1,2 DG 36:4       | 1±0.05 | 0.14±0.01 |
| PC 40:1           | 1±0.11 | 0.14±0.14 |
| LPC 18:1          | 1±0.01 | 0.16±0    |
| LPC 20:1          | 1±0.04 | 0.17±0    |
| 16:0-Stigmasterol | 1±0    | 0.18±0.01 |
| 16:1-Sitosterol   | 1±0    | 0.18±0.01 |
| 1,3 DG 38:1       | 1±0    | 0.19±0.01 |
| 1,2 DG 38:1       | 1±0    | 0.19±0.01 |
| PE 34:1           | 1±0.46 | 0.21±0.02 |
| 1,2 DG 34:3       | 1±0.01 | 0.21±0.05 |
| 1,2 DG 38:4       | 1±0.14 | 0.22±0.02 |
| 20:2-Stigmasterol | 1±0.06 | 0.22±0.06 |
| 20:3-Sitosterol   | 1±0.06 | 0.22±0.06 |
| 20:1-Campesterol  | 1±0.06 | 0.26±0    |
| LPC 18:0          | 1±0.1  | 0.26±0.01 |
| PC 36:4           | 1±0.03 | 0.26±0.02 |

|                   |        |            |
|-------------------|--------|------------|
| LPE 16:0          | 1±0.07 | 0.56±0.06  |
| PC 35:5           | 1±0.02 | 0.58±0.06  |
| TG 54:0           | 1±0.04 | 0.59±0.1,3 |
| PC 37:1           | 1±0.01 | 0.6±0.02   |
| TG 58:3           | 1±0    | 0.6±0.02   |
| PC 36:1           | 1±0.01 | 0.6±0.03   |
| PC 36:2           | 1±0.03 | 0.6±0.04   |
| 16:2-Campesterol  | 1±0.02 | 0.62±0.01  |
| PC 36:0           | 1±0.01 | 0.64±0.02  |
| 1,3 DG 36:1       | 1±0.03 | 0.67±0.01  |
| TG 54:1           | 1±0.05 | 0.68±0.01  |
| PC 35:4           | 1±0.02 | 0.68±0.02  |
| PC 34:3           | 1±0.02 | 0.71±0.02  |
| PC 37:2           | 1±0.02 | 0.72±0.07  |
| PC 38:0           | 1±0.02 | 0.73±0.02  |
| PC 38:3           | 1±0.05 | 0.74±0.1   |
| PC 35:1           | 1±0    | 0.75±0.03  |
| 16:2-Stigmasterol | 1±0.04 | 0.77±0.02  |
| 16:3-Sitosterol   | 1±0.04 | 0.77±0.02  |
| 1,3 DG 38:3       | 1±0.04 | 0.77±0.02  |
| TG 55:6           | 1±0.08 | 0.79±0.08  |
| PE 38:5           | 1±0.1  | 0.81±0.03  |

|                   |        |           |
|-------------------|--------|-----------|
| PC 42:1           | 1±0.06 | 0.26±0.26 |
| 18:3-Sitosterol   | 1±0.11 | 0.27±0    |
| 18:2-Stigmasterol | 1±0.11 | 0.27±0    |
| 18:3-Campesterol  | 1±0.16 | 0.27±0.01 |
| 1,2 DG 34:4       | 1±0.06 | 0.28±0    |
| 1,3 DG 34:4       | 1±0.06 | 0.29±0    |
| 22:2-Campesterol  | 1±0.29 | 0.34±0.01 |
| LPC 16:1          | 1±0.05 | 0.35±0.27 |
| PC 40:4           | 1±0.18 | 0.35±0.35 |
| PC 38:2           | 1±0.02 | 0.36±0.01 |
| TG 60:4           | 1±0.02 | 0.37±0.02 |
| 18:0-Campesterol  | 1±0.02 | 0.37±0.04 |
| 18:2-Campesterol  | 1±0.01 | 0.37±0.18 |
| TG 54:5           | 1±0.06 | 0.39±0.02 |
| 16:2-Sitosterol   | 1±0.01 | 0.39±0.1  |
| TG 58:4           | 1±0.02 | 0.47±0    |

|                   |        |           |
|-------------------|--------|-----------|
| TG 54:2           | 1±0.08 | 0.81±0.06 |
| TG 52:0           | 1±0.03 | 0.83±0.02 |
| TG 56:3           | 1±0.05 | 0.85±0.03 |
| TG 53:3           | 1±0.06 | 0.86±0    |
| 1,3 DG 35:2       | 1±0.04 | 0.86±0.01 |
| TG 54:4           | 1±0.04 | 0.89±0.04 |
| 1,2 DG 38:3       | 1±0.02 | 0.91±0.02 |
| TG 56:2           | 1±0.03 | 0.91±0.02 |
| 16:1-Stigmasterol | 1±0.01 | 0.39±0.1  |
| 1,3 DG 38:2       | 1±0.01 | 0.39±0.1  |
| TG 58:5           | 1±0.02 | 0.43±0.03 |
| PC 38:1           | 1±0.02 | 0.44±0.01 |
| TG 58:2           | 1±0.04 | 0.45±0.01 |
| 1,2 DG 38:2       | 1±0.01 | 0.45±0.11 |
| PE 32:0           | 1±0.1  | 0.45±0.22 |
| TG 56:5           | 1±0.06 | 0.46±0.11 |

| <b>Lipid species detected higher in MO</b> |           |            |
|--------------------------------------------|-----------|------------|
| <b>Identification</b>                      | <b>MP</b> | <b>MO</b>  |
| TG 50:4                                    | 1±0.03    | 1.11±0.01  |
| TG 56:4                                    | 1±0.01    | 1.11±0.06  |
| PC 33:4                                    | 1±0.05    | 1.1,2±0.04 |
| PC 35:0                                    | 1±0.02    | 1.1,3±0.05 |
| 1,2 DG 35:5                                | 1±0.04    | 1.14±0.06  |
| TG 53:6                                    | 1±0.03    | 1.17±0.01  |
| TG 52:4                                    | 1±0.03    | 1.18±0.04  |
| TG 51:3                                    | 1±0.04    | 1.24±0.03  |
| TG 52:2                                    | 1±0.04    | 1.28±0.02  |
| 1,3 DG 32:0                                | 1±0.07    | 1.35±0     |
| TG 54:3                                    | 1±0.08    | 1.38±0.1   |
| TG 54:6                                    | 1±0.01    | 1.42±0.21  |
| PC 34:0                                    | 1±0.01    | 1.43±0.05  |
| PC 34:1                                    | 1±0.03    | 1.46±0.05  |
| PC 35:3                                    | 1±0.05    | 1.47±0.19  |
| 1,3 DG 34:0                                | 1±0.05    | 1.51±0.07  |
| PC 34:2                                    | 1±0.02    | 1.53±0.04  |
| TG 49:2                                    | 1±0.04    | 1.53±0.07  |
| PC 33:5                                    | 1±0.08    | 1.54±0.31  |

| <b>Identification</b> | <b>MP</b> | <b>MO</b> |
|-----------------------|-----------|-----------|
| CE 20:1               | 1±0.2     | 2.27±0.14 |
| TG 46:0               | 1±0.04    | 2.15±0.06 |
| TG 50:2               | 1±0.04    | 2.22±0.07 |
| PC 32:2               | 1±0.05    | 2.26±0.08 |
| PE 38:1               | 1±0.38    | 2.26±0.18 |
| TG 50:0               | 1±0.03    | 2.39±0.1  |
| TG 50:1               | 1±0.03    | 2.42±0.11 |
| PC 33:1               | 1±0.08    | 2.51±0.2  |
| PC 32:0               | 1±0       | 2.52±0.16 |
| TG 48:2               | 1±0.03    | 2.59±0.07 |
| TG 53:1               | 1±0.01    | 2.75±0.07 |
| CE16:0                | 1±0.11    | 2.76±0.04 |
| TG42:1                | 1±0.1,2   | 2.82±0    |
| TG 49:0               | 1±0.15    | 2.85±0.12 |
| TG42:2                | 1±0.05    | 2.88±0.07 |
| 1,3 DG                | 1±0.18    | 2±0.49    |
| CE 18:3               | 1±0.14    | 3.03±0.04 |
| TG 50:3               | 1±0.04    | 3.11±0.05 |
| TG 49:1               | 1±0.33    | 3.24±0.03 |

|             |        |           |
|-------------|--------|-----------|
| TG 51:5     | 1±0.03 | 1.55±0.07 |
| PI 36:2     | 1±0.02 | 1.71±0.01 |
| PI 36:1     | 1±0.19 | 1.71±0.11 |
| 1,2 DG 34:2 | 1±0.05 | 1.72±0.02 |
| TG 52:3     | 1±0.05 | 1.75±0    |
| TG 55:4     | 1±0.02 | 1.75±0.09 |
| 1,3 DG 34:1 | 1±0.04 | 1.77±0.07 |
| TG 49:3     | 1±0.03 | 1.78±0.15 |
| 1,2 DG 32:1 | 1±0.04 | 1.81±0.04 |
| PE 35:1     | 1±0.05 | 1.81±0.43 |
| TG 56:6     | 1±0.01 | 1.84±0.07 |
| 1,2 DG 35:6 | 1±0.09 | 1.86±0.08 |
| TG 46:2     | 1±0.02 | 1.87±0.05 |
| PI 36:0     | 1±0.03 | 1.93±0.23 |
| TG 55:2     | 1±0.04 | 1.96±0.01 |
| PC 33:3     | 1±0.04 | 1.96±0.41 |
| TG 46:1     | 1±0.02 | 1.97±0.02 |
| TG 50:5     | 1±0.2  | 2.05±0.42 |
| PC 32:1     | 1±0.01 | 2.08±0.08 |

|             |         |            |
|-------------|---------|------------|
| 1,3DG 32:2  | 1±0.09  | 3.25±0.15  |
| TG 48:1     | 1±0.03  | 3.32±0.04  |
| CE 16:3     | 1±0.01  | 3.38± 0.52 |
| TG 42:0     | 1±0.01  | 3.42±0.02  |
| TG 55:5     | 1±0.04  | 3.42±0.02  |
| TG 51:1     | 1±0.01  | 3.45±0.08  |
| 1,2 DG 36:5 | 1±0.01  | 3.52±0.16  |
| TG 44:0     | 1±0.1,3 | 3.91±0.03  |
| TG 48:0     | 1±0.03  | 4.32±0.05  |
| PI 36:4     | 1±0.03  | 4.33±0.02  |
| TG 48:3     | 1±0.05  | 4.49±0.2   |
| TG 53:2     | 1±0.02  | 4.89±0.14  |
| CE 19:0     | 1±0.19  | 4.95±1.36  |
| TG 44:2     | 1±0.03  | 4.96±0.06  |
| PI 34:2     | 1±0.15  | 5.52±0.26  |
| PI 34:1     | 1±0.03  | 5.66±0.25  |
| PI 34:0     | 1±0.06  | 5.74±0.02  |
| CE 18:2     | 1±1     | 5.84±1.09  |
| PI 36:3     | 1±1     | 6.82±0.57  |
| TG 44:3     | 1±0.03  | 6.9±0.21   |



| <b>Species detected uniquely in MP</b> | <b>Species detected uniquely in MO</b> |                 |
|----------------------------------------|----------------------------------------|-----------------|
| TG 51:4                                | MG 18:0                                | MG 22:6         |
| TG 53:0                                | LPC 22:0                               | LPE 18:0        |
| TG 51:0                                | PC 40:2                                | LPC 18:3        |
| 1,3 DG 35:4                            | LPC 19:0                               | 22:0-Sitosterol |
| 1,3 DG 36:5                            | PC 36:6                                | 1,3 DG 36:6     |
| TG 51:2                                | TG 52:6                                | TG 51:4         |
| MG 20:5                                | PC 38:8                                | 1,3 DG 35:4     |
| TG 52:6                                | PC 34:4                                | TG 51:0         |
|                                        | LPE 18:2                               | TG 51:2         |
|                                        | PC 36:5                                | 1,3 DG 36:5     |
|                                        | PC 38:7                                | TG 53:0         |
